# Supplementary material for: The Novel Enterococcus Phage vB_EfaS_HEf13 Has Broad Lytic Activity Against Clinical Isolates of Enterococcus faecalis
Source: PubMed Central journal article supplement (PMC6927925; doi:10.3389/fmicb.2019.02877), 2019-12-17
Supplement: Presentation_1.pdf [file Presentation_1.pdf]

## Supplementary figure 1

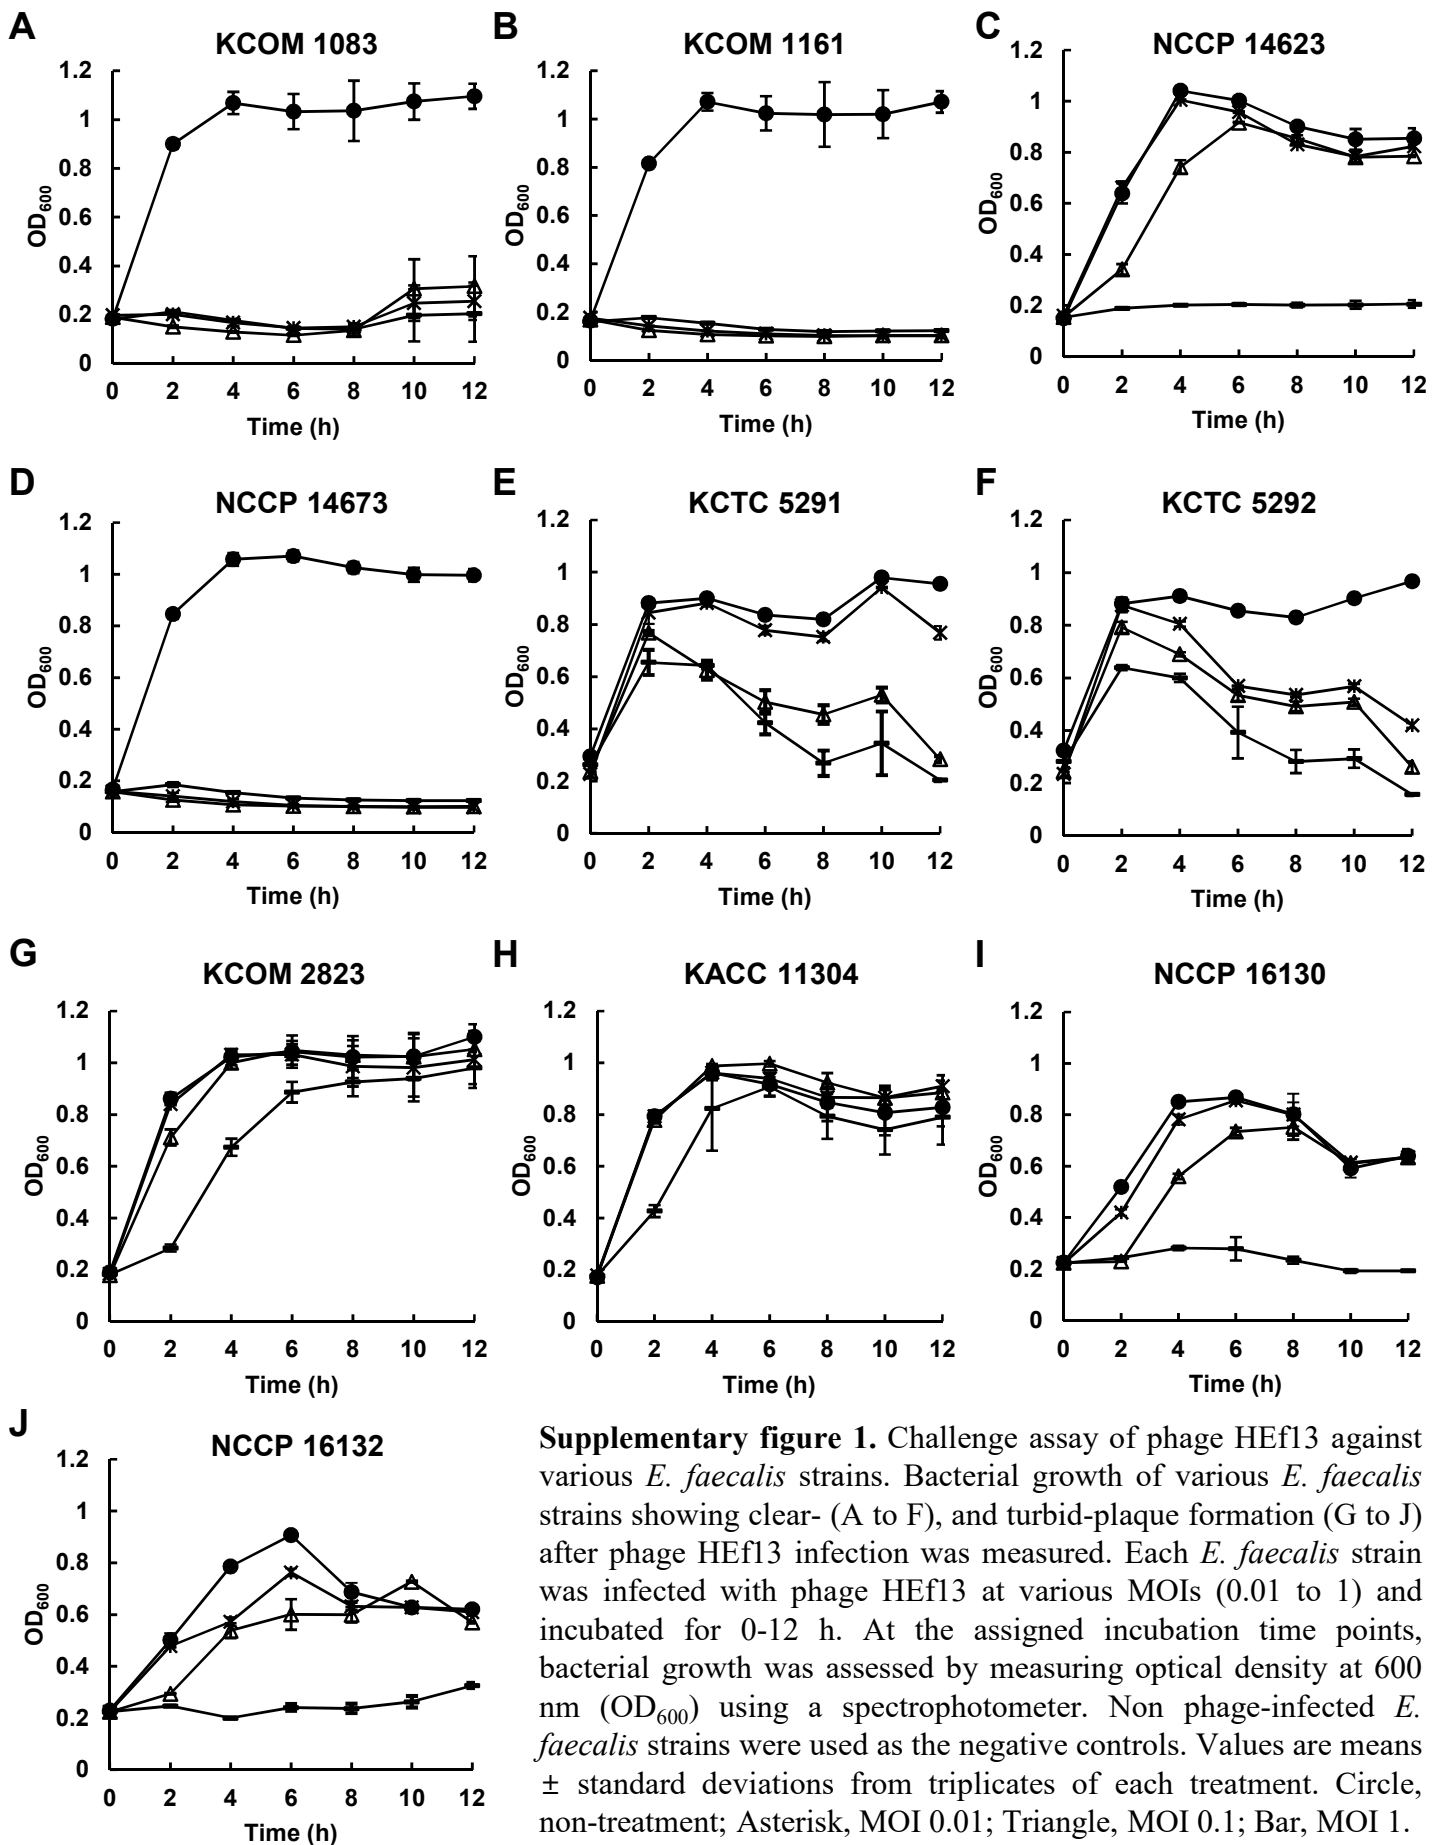

**Supplementary figure 1.** Challenge assay of phage HEf13 against various *E. faecalis* strains. Bacterial growth of various *E. faecalis* strains showing clear- (A to F), and turbid-plaque formation (G to J) after phage HEf13 infection was measured. Each *E. faecalis* strain was infected with phage HEf13 at various MOIs (0.01 to 1) and incubated for 0-12 h. At the assigned incubation time points, bacterial growth was assessed by measuring optical density at 600 nm ( $OD_{600}$ ) using a spectrophotometer. Non phage-infected *E. faecalis* strains were used as the negative controls. Values are means  $\pm$  standard deviations from triplicates of each treatment. Circle, non-treatment; Asterisk, MOI 0.01; Triangle, MOI 0.1; Bar, MOI 1.
